# Supplementary material for: An efficient synthesis of NaA zeolite membranes from direct crystallization of gel-dipped macroporous alumina tubes with seeds
Source: Royal Society of Chemistry journal article supplement (doi:10.1039/c8ta00380g), 2018-01-01
Supplement: c8ta00380g1.pdf [file c8ta00380g1.pdf]

## **Electronic Supplementary Information**

### **An efficient synthesis of NaA zeolite membranes from direct crystallization of gel-dipped macroporous alumina tubes with seeds**

Shuxiang Pan,<sup>a</sup> Xiangju Meng,<sup>\*a</sup> Zhengbao Wang,<sup>b</sup> Yushan Yan,<sup>b,c</sup> and Feng-Shou Xiao<sup>\*a</sup>

<sup>a</sup> Key Lab of Applied Chemistry of Zhejiang Province and Department of Chemistry, Zhejiang University, Hangzhou 310007, China.

<sup>b</sup> College of Chemical and Biological Engineering, and MOE Engineering Research Center of Membrane and Water Treatment Technology, Zhejiang University, Hangzhou 310027, China

<sup>c</sup> Department of Chemical and Biomolecular Engineering, University of Delaware, Newark, DE 19716, USA

\* Corresponding author E-mail: mengxj@zju.edu.cn; fsxiao@zju.edu.cn

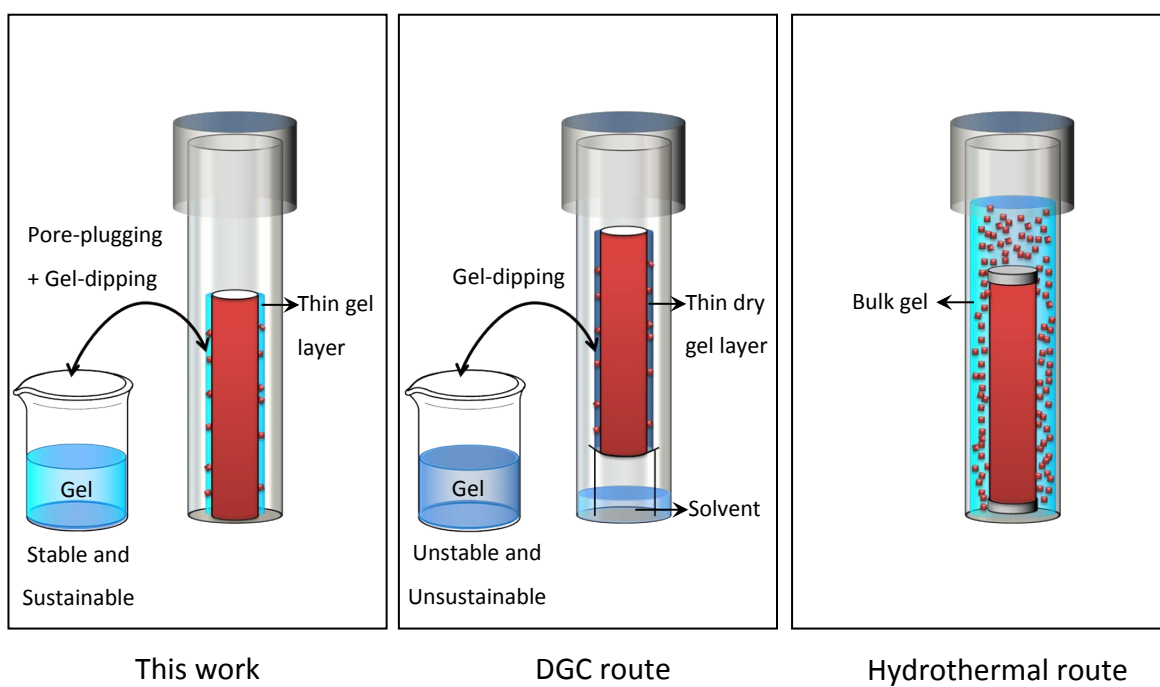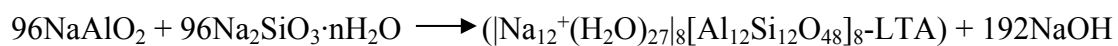

**Fig. S1** Preparation of NaA membranes from this work, DGC route, and hydrothermal route.

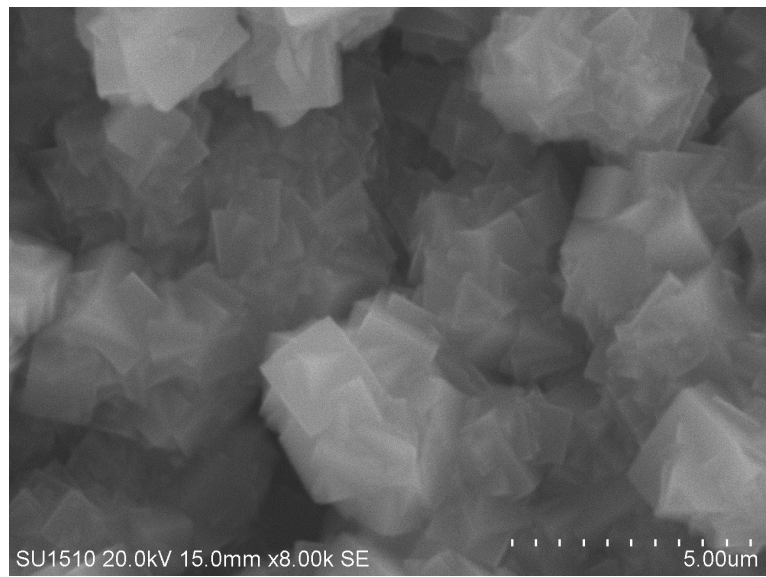

**Fig. S2** SEM image of top view of the NaA membrane crystallized at 100°C for 4 h this work with higher magnification than Fig.1-b.

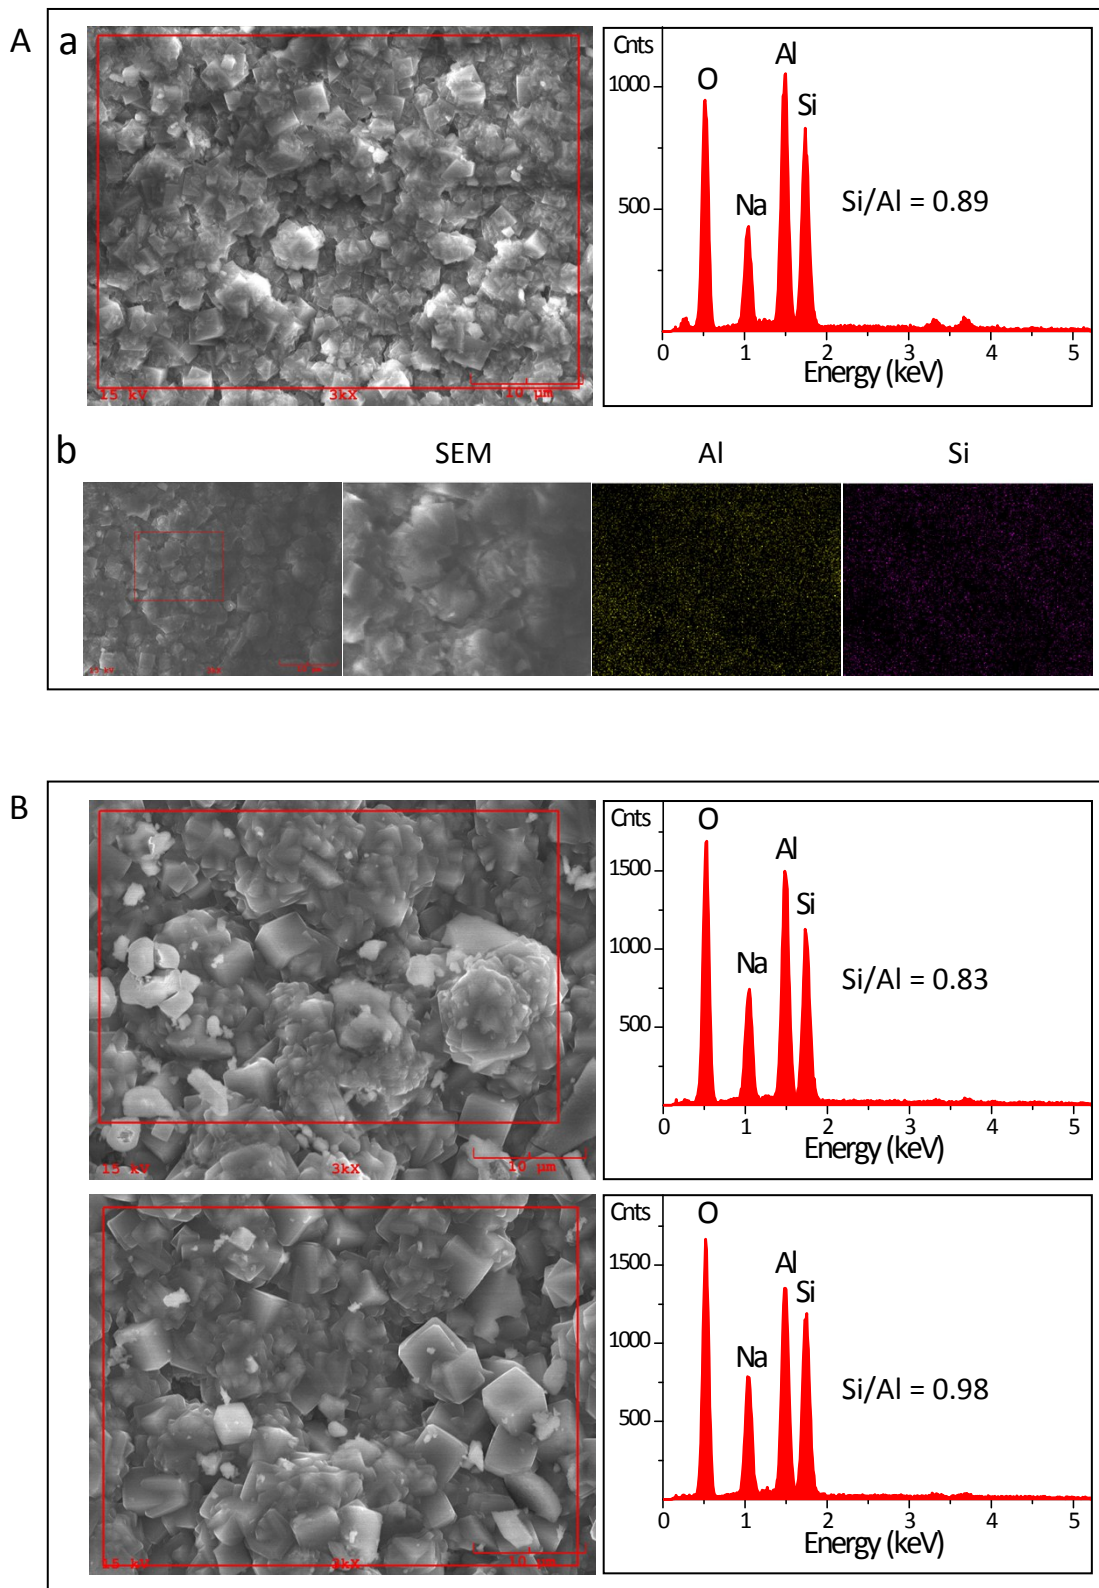

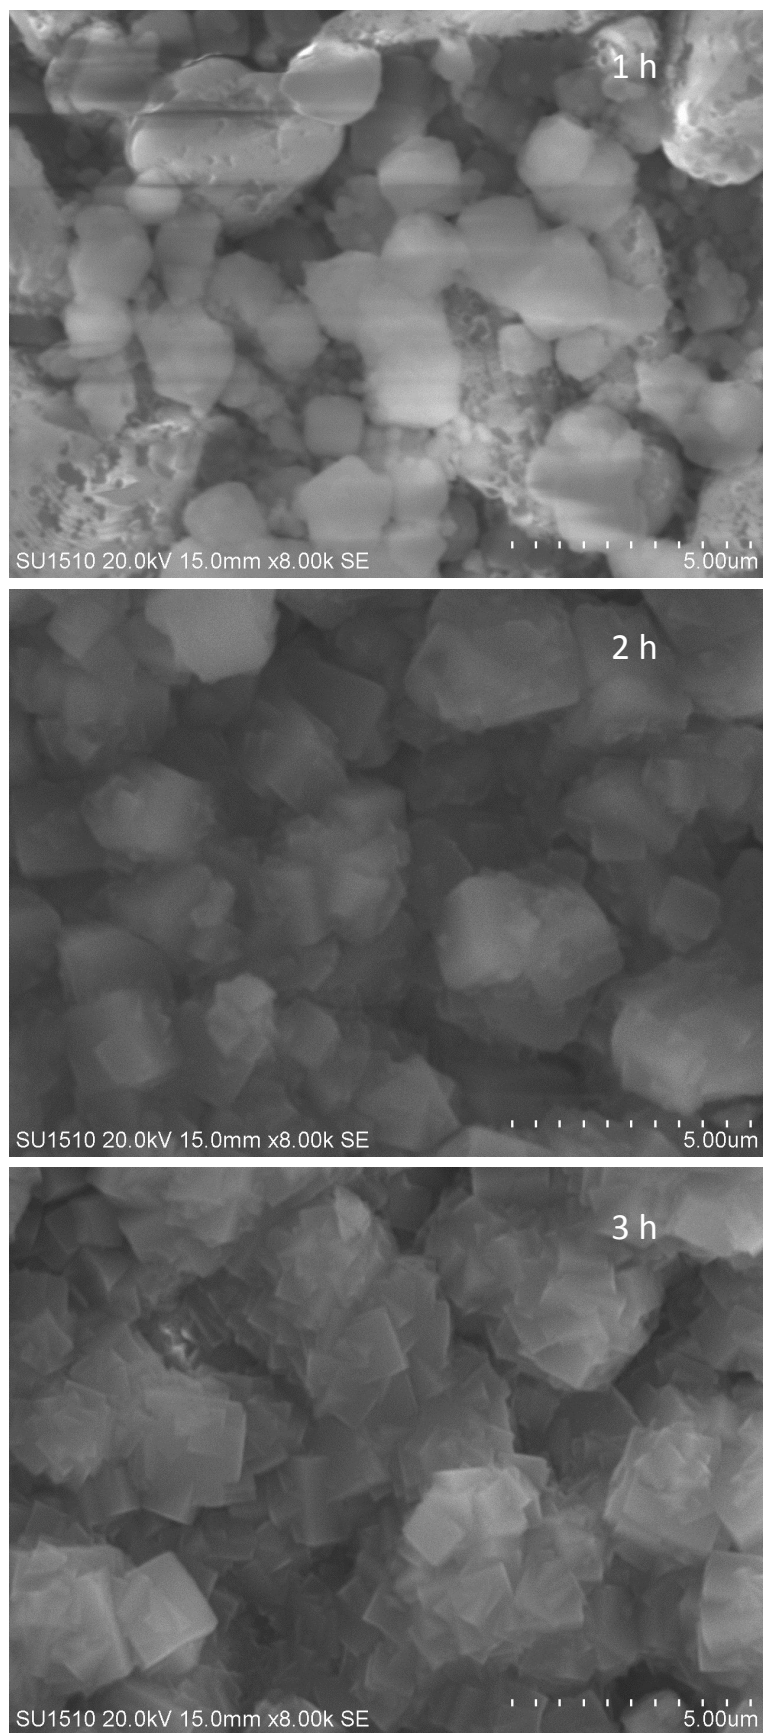

**Fig. S4** SEM images of top view of the NaA membranes crystallized at 100°C for 1 h, 2 h and 3 h from this work with higher magnification than Fig.5-B.
